# Supplementary material for: Characterization of Anticancer Effects of the Analogs of DJ4, a Novel Selective Inhibitor of ROCK and MRCK Kinases
Source: MDPI journal article supplement (doi:10.3390/ph16081060), 2023-07-26
Supplement: s1 [file s1]

## Supplementary Figures

**Figure S1**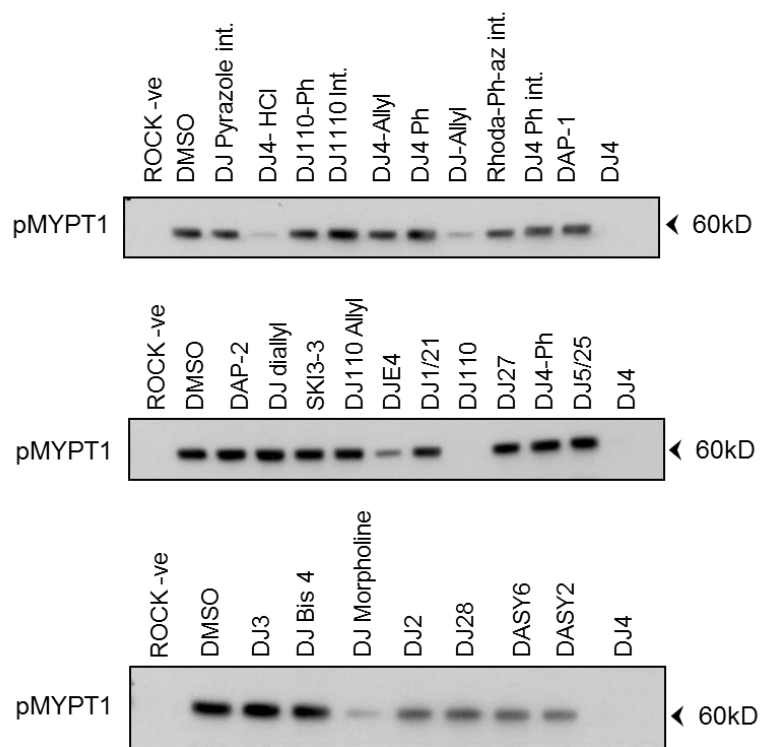**Figure S1. Screening of analogs in the *in vitro* kinase activity assay to identify active ROCK1 inhibitors**

Kinase inhibitory activity of the 27 compounds was evaluated by *in vitro* cell-free biochemical kinase activity assay. The compounds (1  $\mu$ M) were incubated with recombinant ROCK1 (9.48nM), recombinant MYPT1 (a kinase substrate, 84 nM) and ATP (25  $\mu$ M). Phosphorylation status of the substrate (pMYPT1) was analyzed to study the kinase activity.

## Supplementary Figure S2

A. Single-dose (10 $\mu$ M) NCI60 cell line screen (DJ4)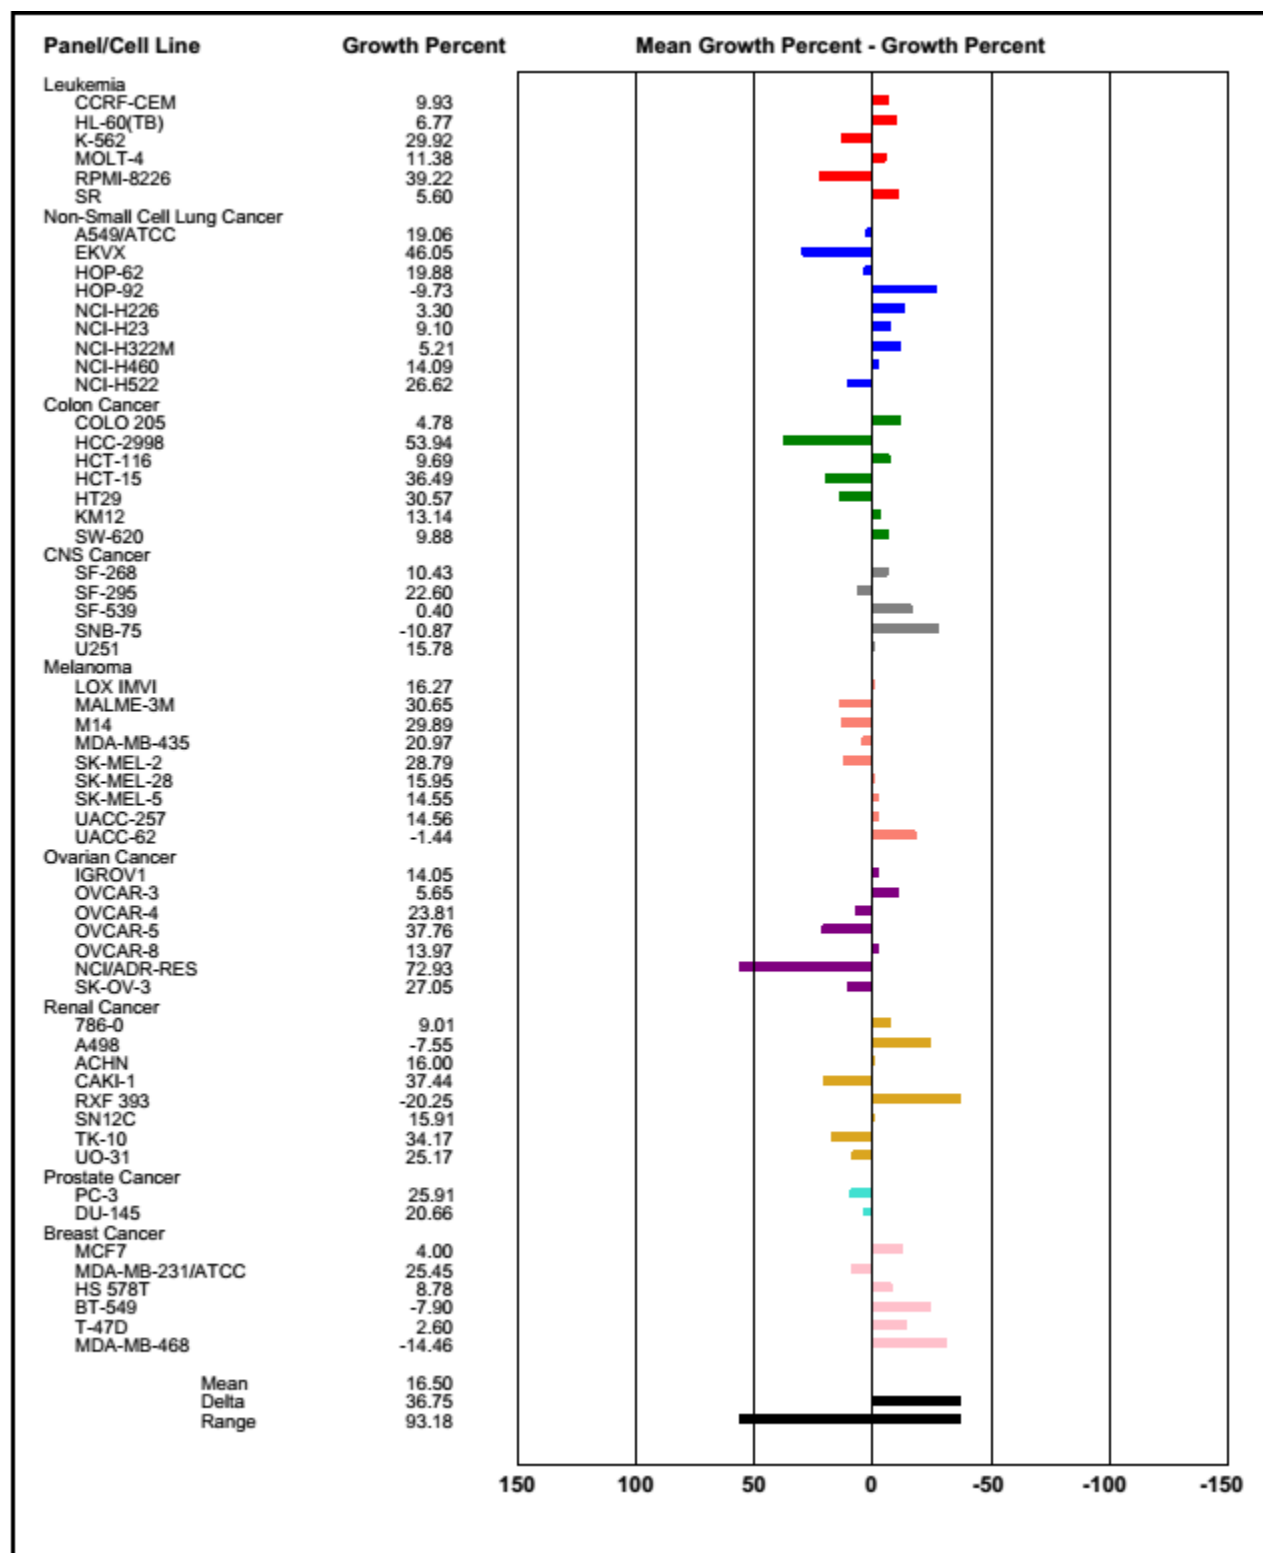

## Supplementary Figure S2

B. Single-dose (10 $\mu$ M) NCI60 cell line screen (DJE4)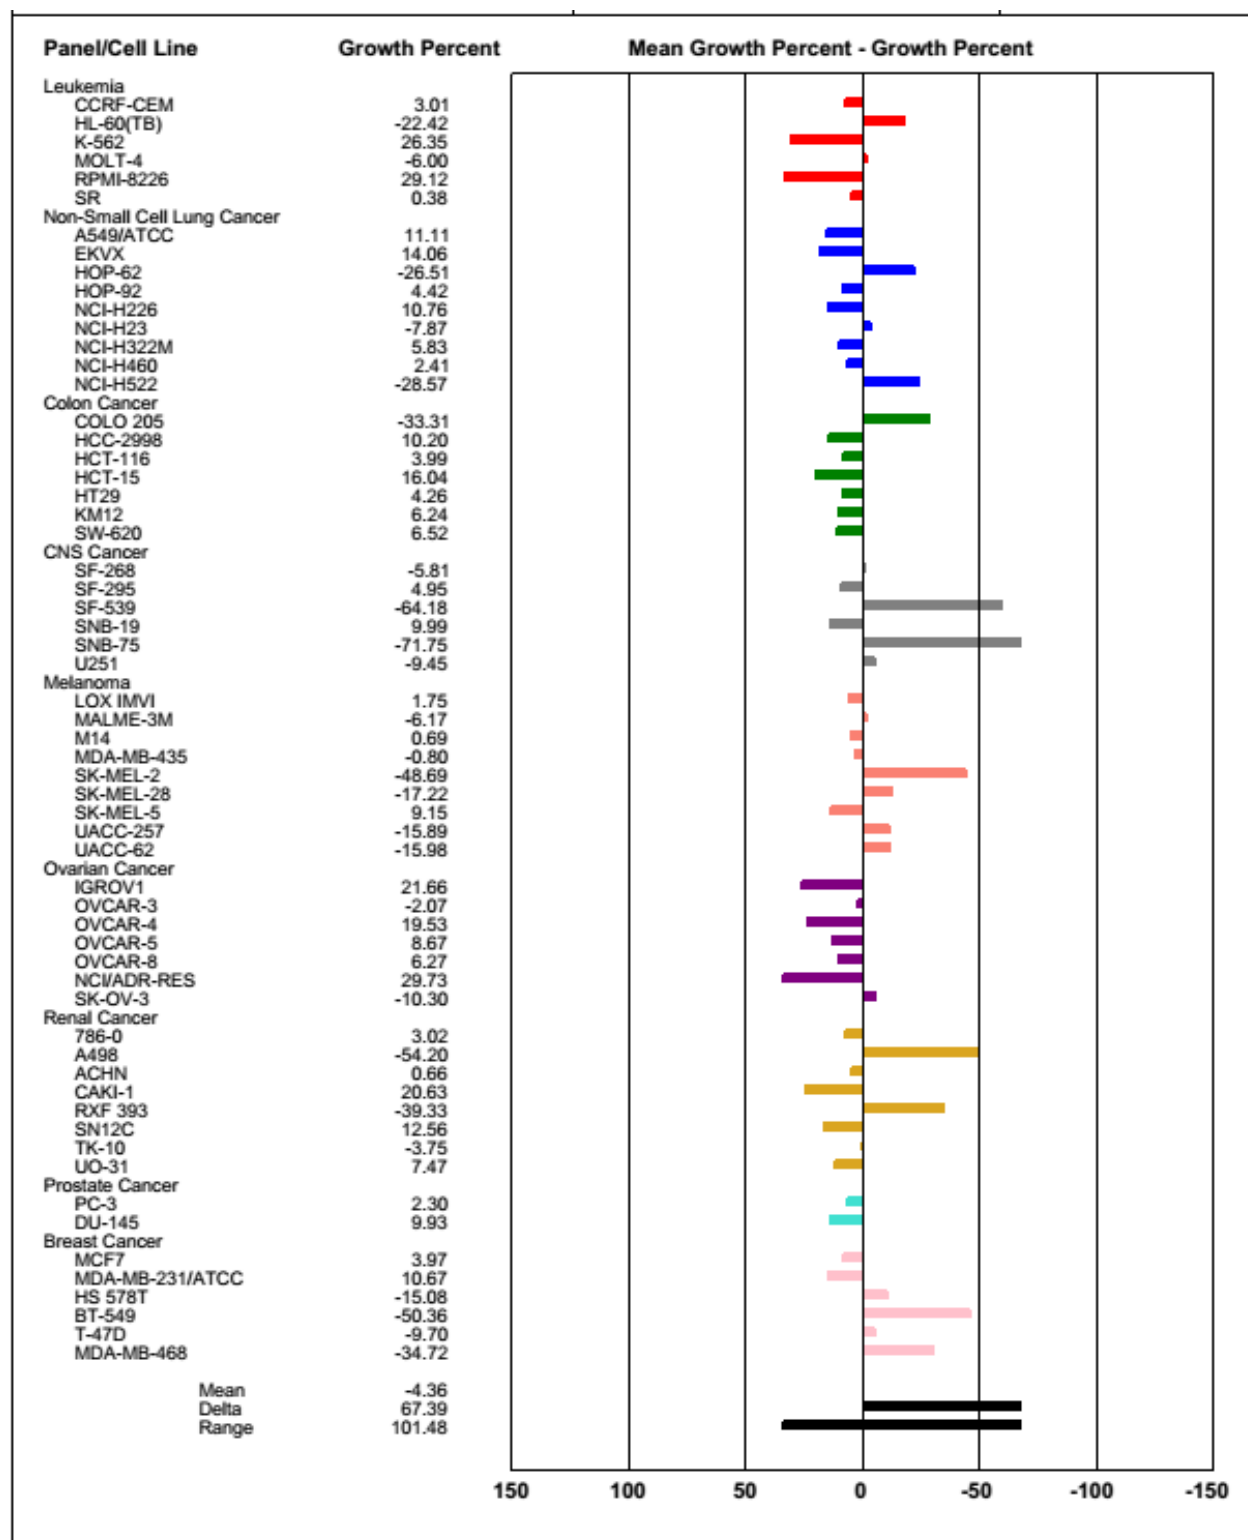

## Supplementary Figure S2

C. Single-dose (10 $\mu$ M) NCI60 cell line screen (DJ-Allyl)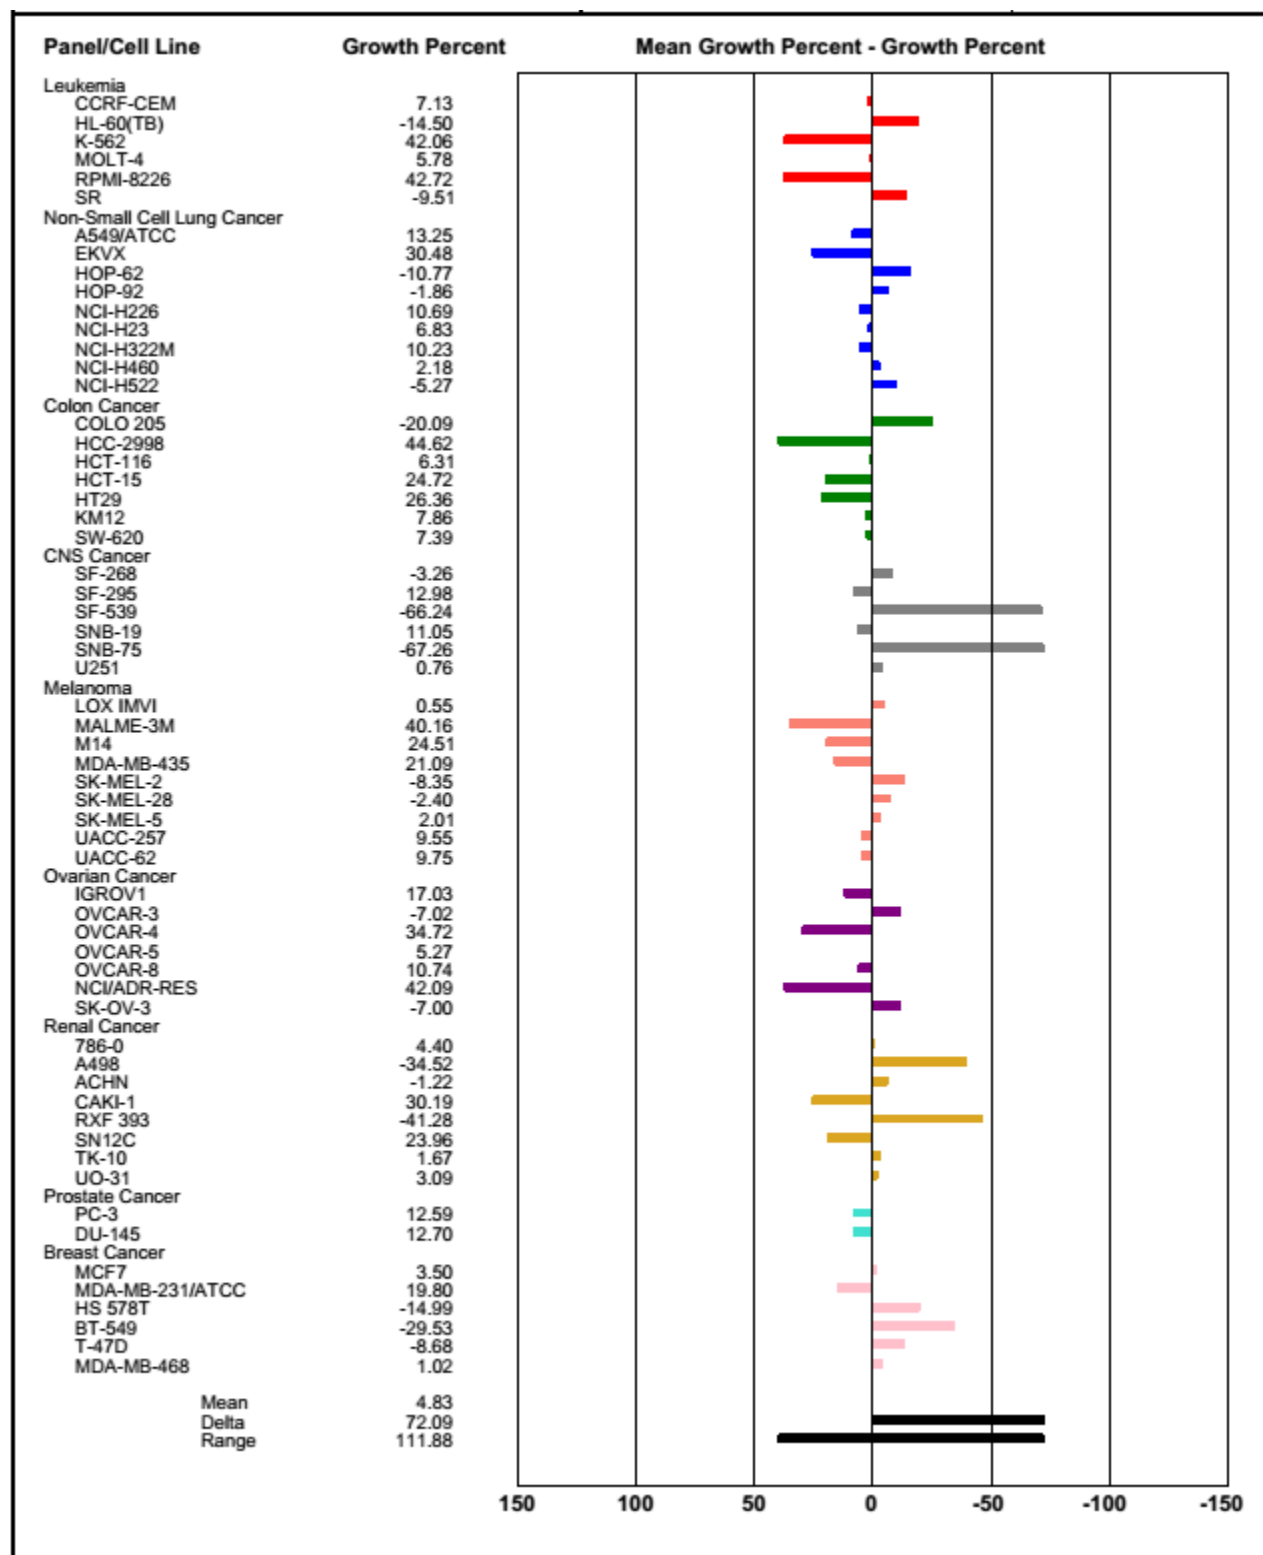

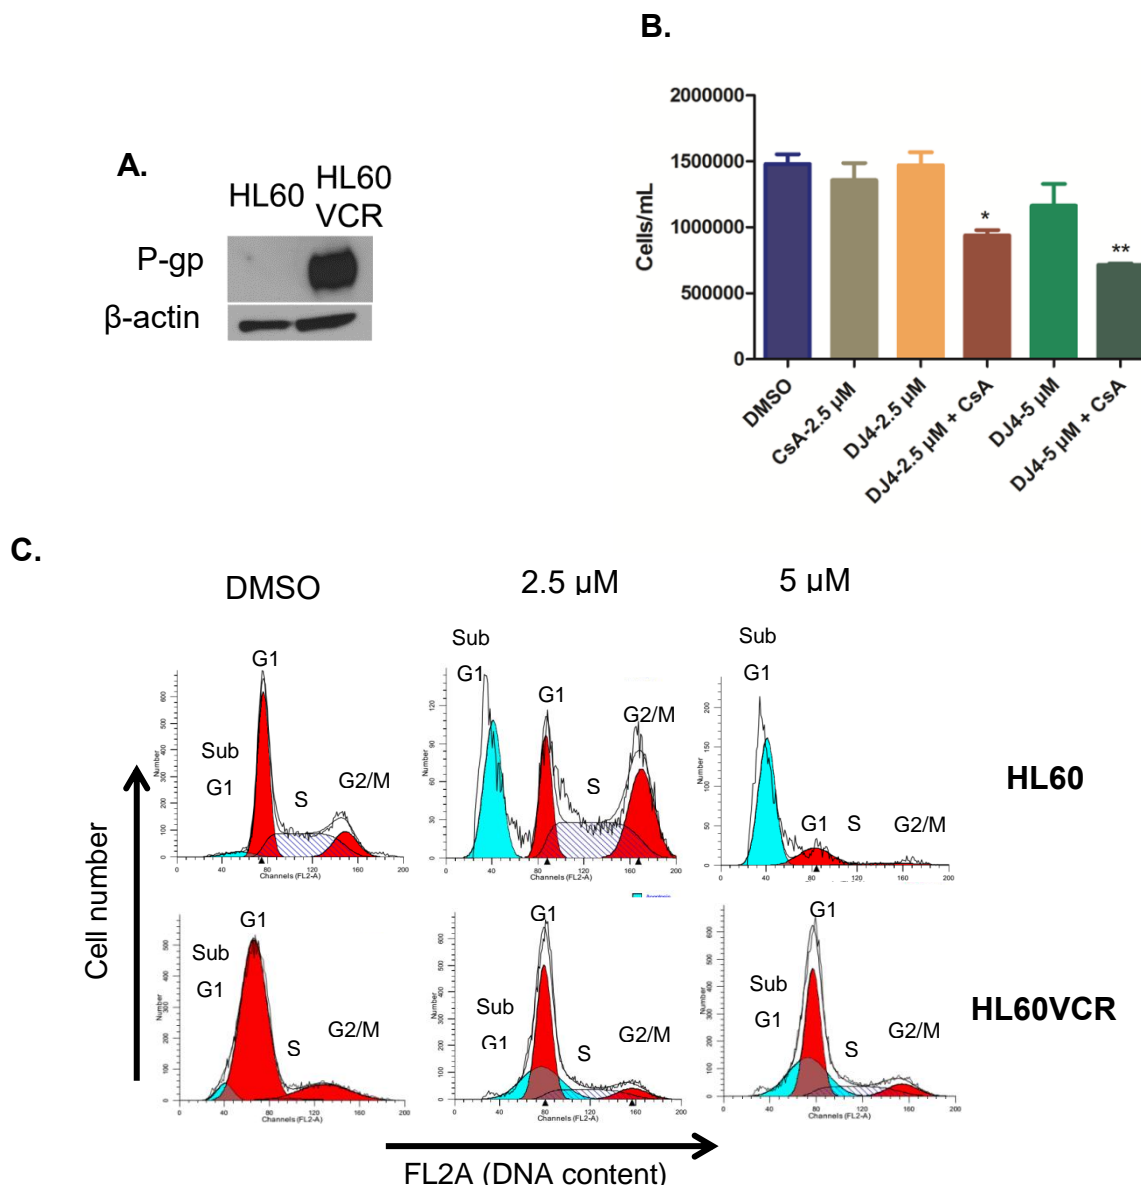

**Figure S3. DJ4 was ineffective in multidrug resistant HL60VCR acute myeloid leukemia cells.**

**A.** Endogenous expression of p-glycoprotein (P-gp) in HL60 and HL60VCR (multidrug resistant cells). β-Actin was used as internal control.

**B.** P-gp inhibitor cyclosporine A (CsA) treatment (2.5 μM) sensitized resistant cancer cells to DJ4. Cells were treated either with DJ4 or CsA alone or in combination. Number of cells were counted using Muse<sup>TM</sup> cell analyzer. Statistical significance was analyzed by one-way ANOVA and Dunnett's multiple comparison post-test.  $P < 0.05\%$ .  $n=2$ . Data is representative of two independent experiments.

**C.** Cell cycle analysis in HL60 and HL60VCR cells. The cells were treated at 2.5 μM and 5 μM concentrations and analyzed using flow cytometry. Apoptotic cell population is indicated by sub-G1 phase.
